# Supplementary material for: Genetic Diversity and Population Structure of Common Bean (Phaseolus vulgaris L.) Landraces in the Lazio Region of Italy
Source: MDPI journal article supplement (doi:10.3390/plants12040744), 2023-02-07
Supplement: s1 [file s1]

## Additional Figures

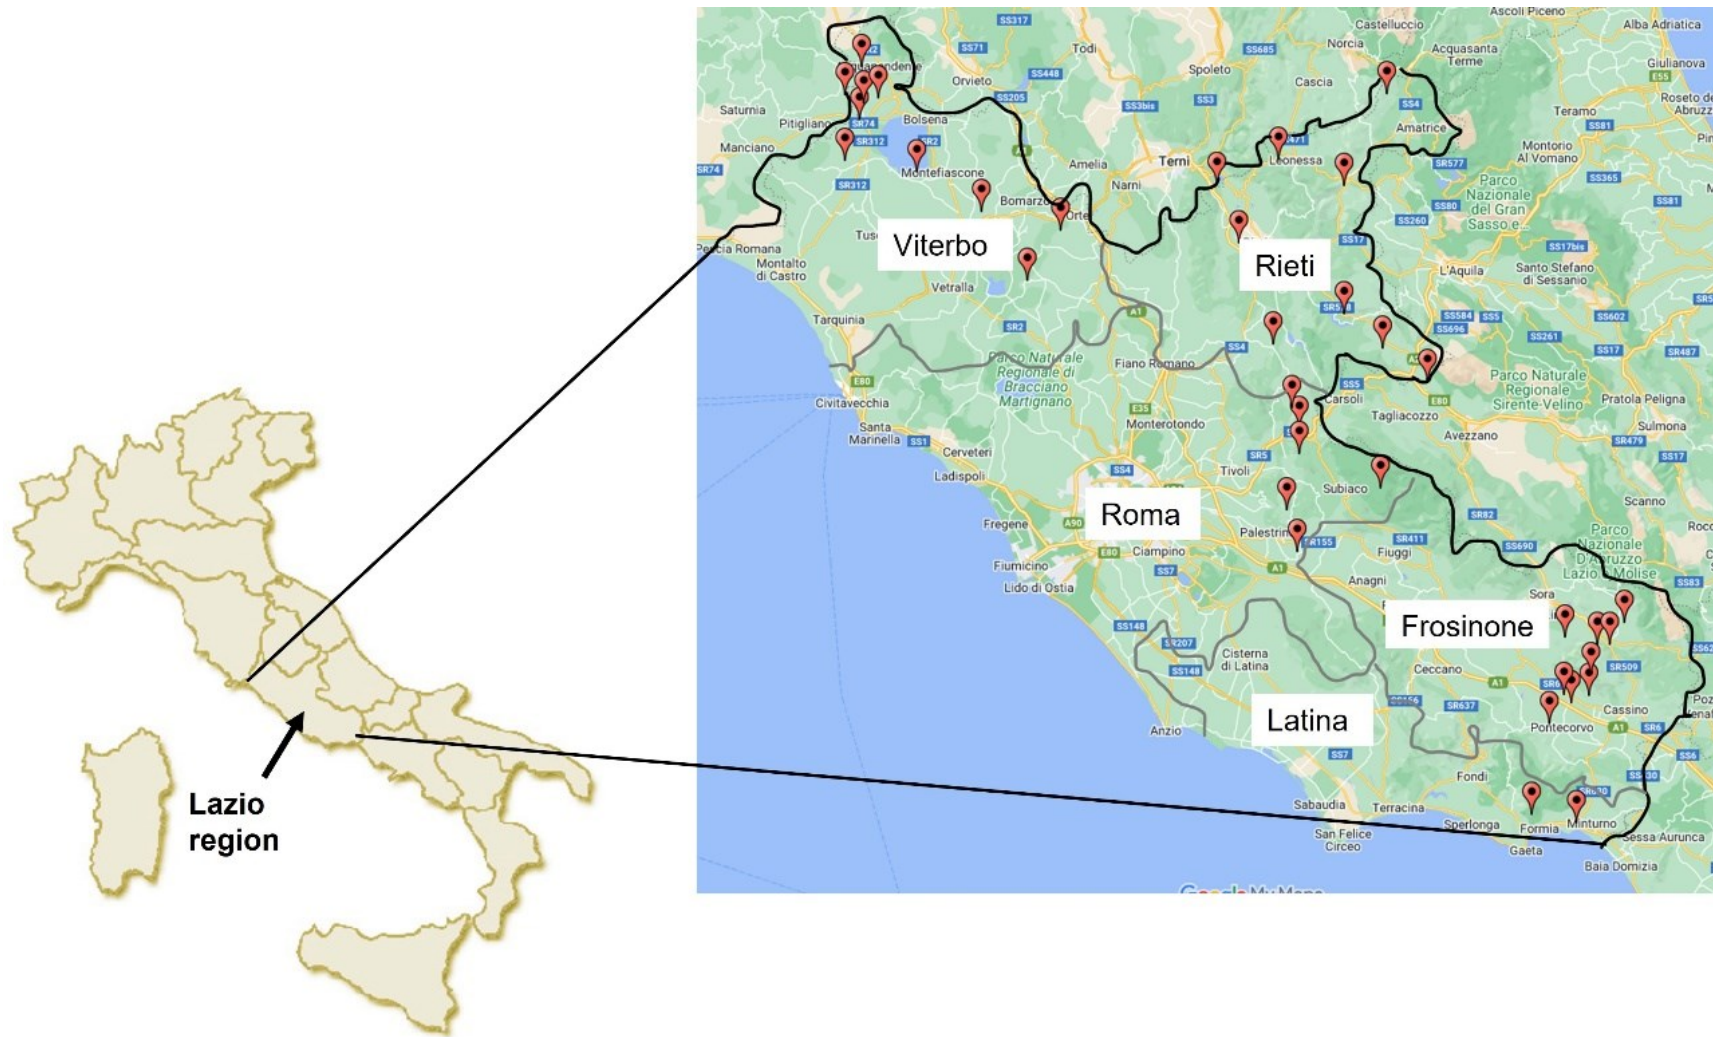

**Figure S1.** Locations of origin of the 114 accessions in the five provinces of the Lazio Region (adapted from Google Maps).

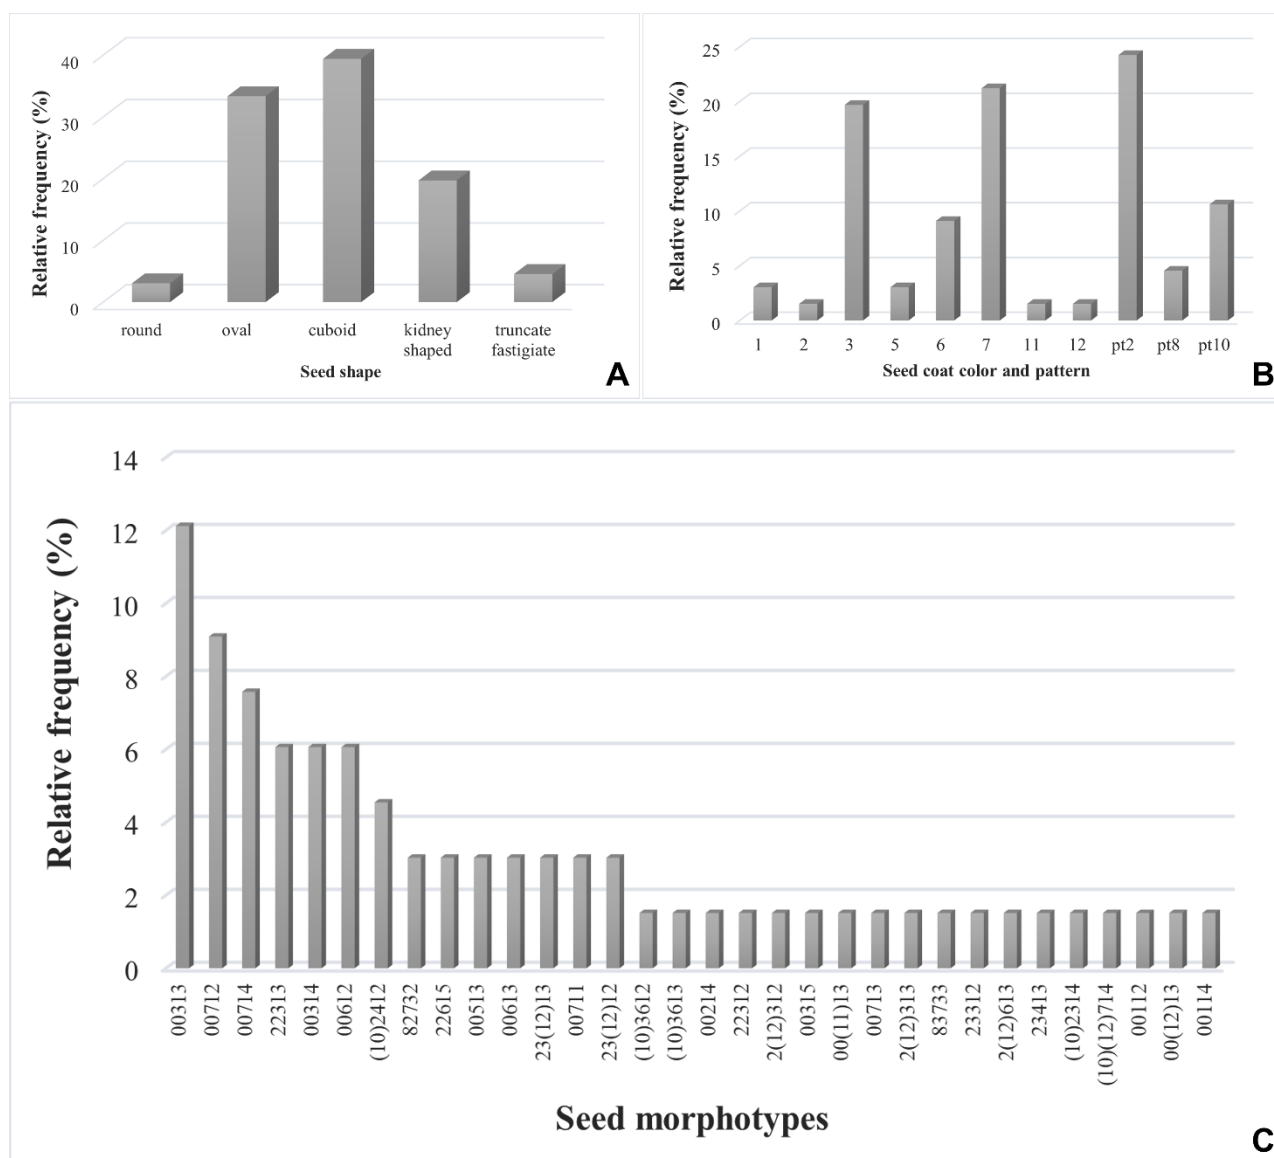

**Figure S2.** Frequency distribution of seed shape (A), seed coat color and pattern (B) and “seed morphotypes” (C) within the 66 common bean landraces collected from different areas of Lazio region. In the panel B in addition to the colors detected for the plain coat seeds (indicated by numbers according to the IPBGR descriptors), the different types of seed coat patterns (pt) are also reported. 1= black; 2= brown, pale to dark; 3= maroon; 5= yellow to greenish yellow; 6= pale-cream to buff (6); 7= pure white; 11= green to olive; 12= red; pt2= striped; pt8= bicolor; pt10= pattern around hilum.

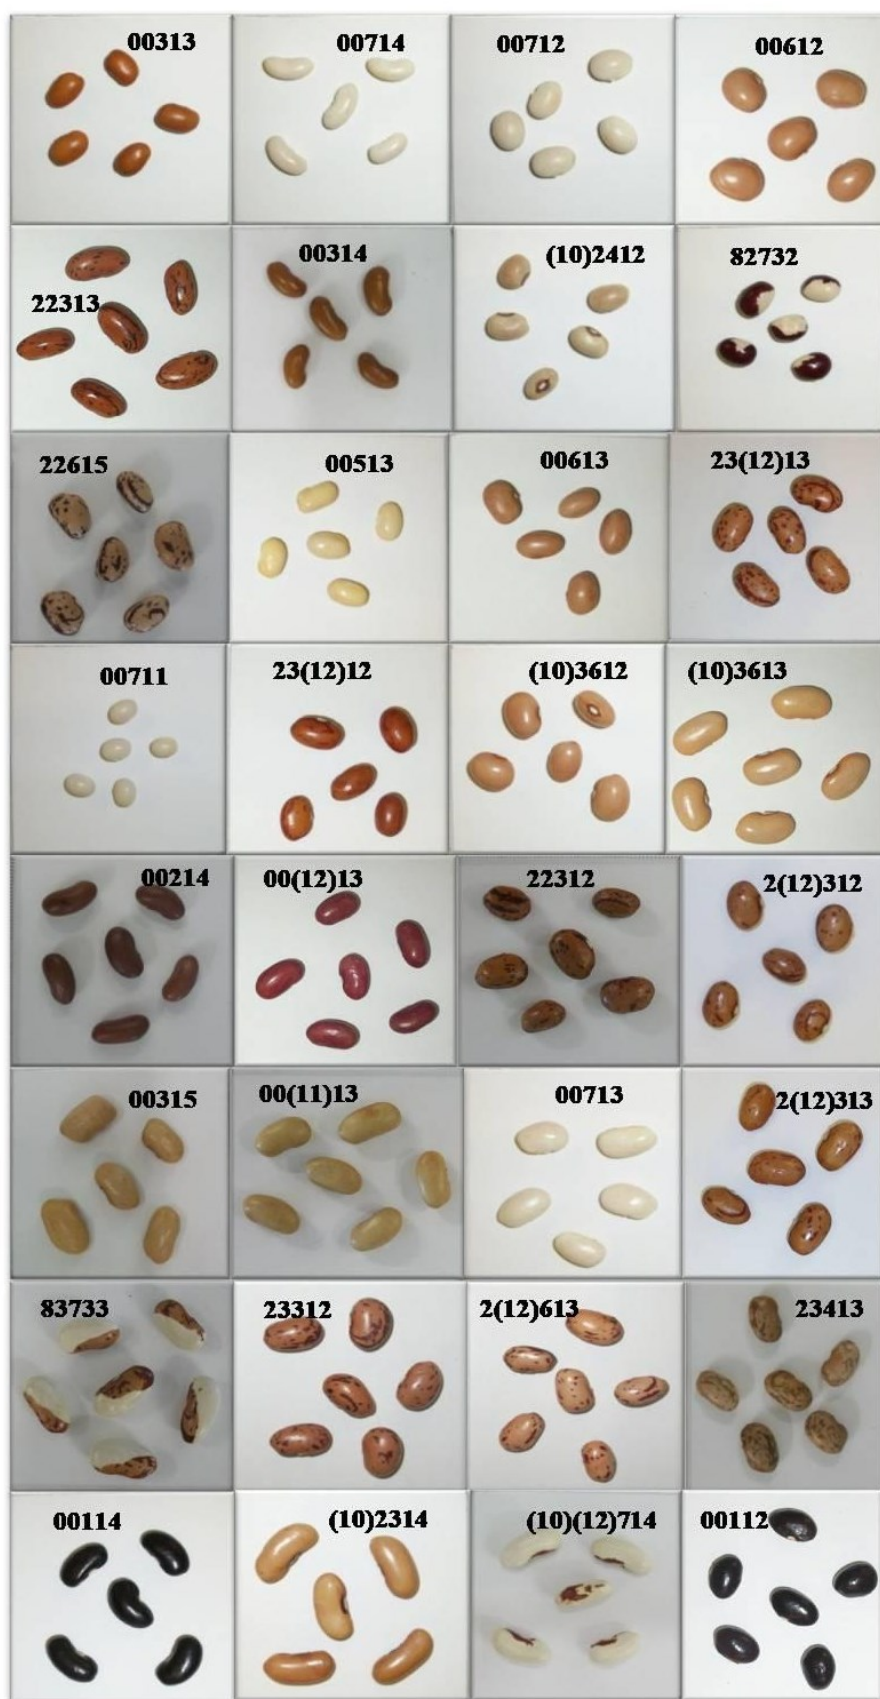

**Figure S3.** The 32 “seed morphotypes” identified for the 66 common bean landraces collected from different areas of the Lazio Region.

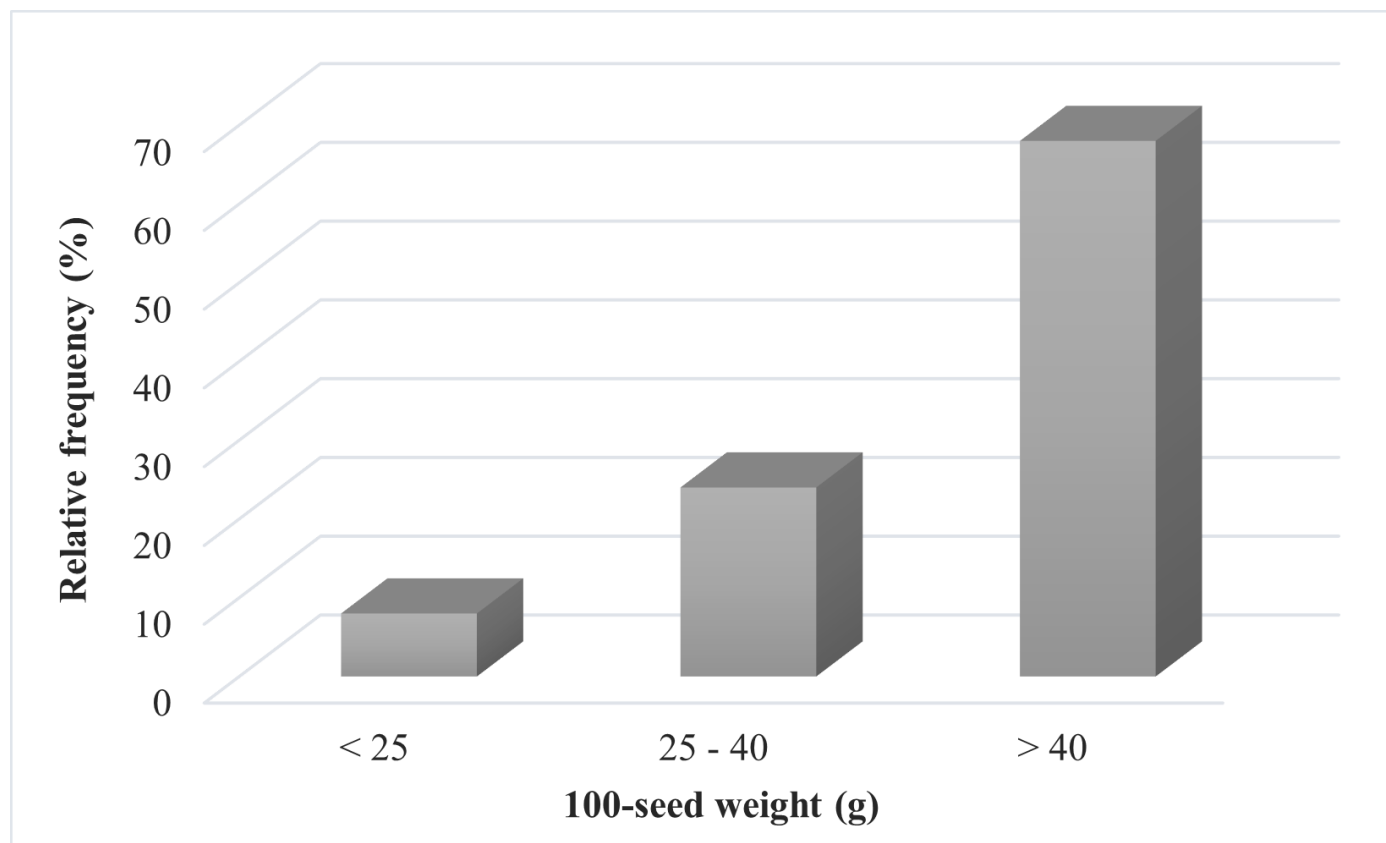

**Figure S4.** Frequency distribution of 100-seed weight within the 66 common bean landraces collected from different area of the Lazio Region.

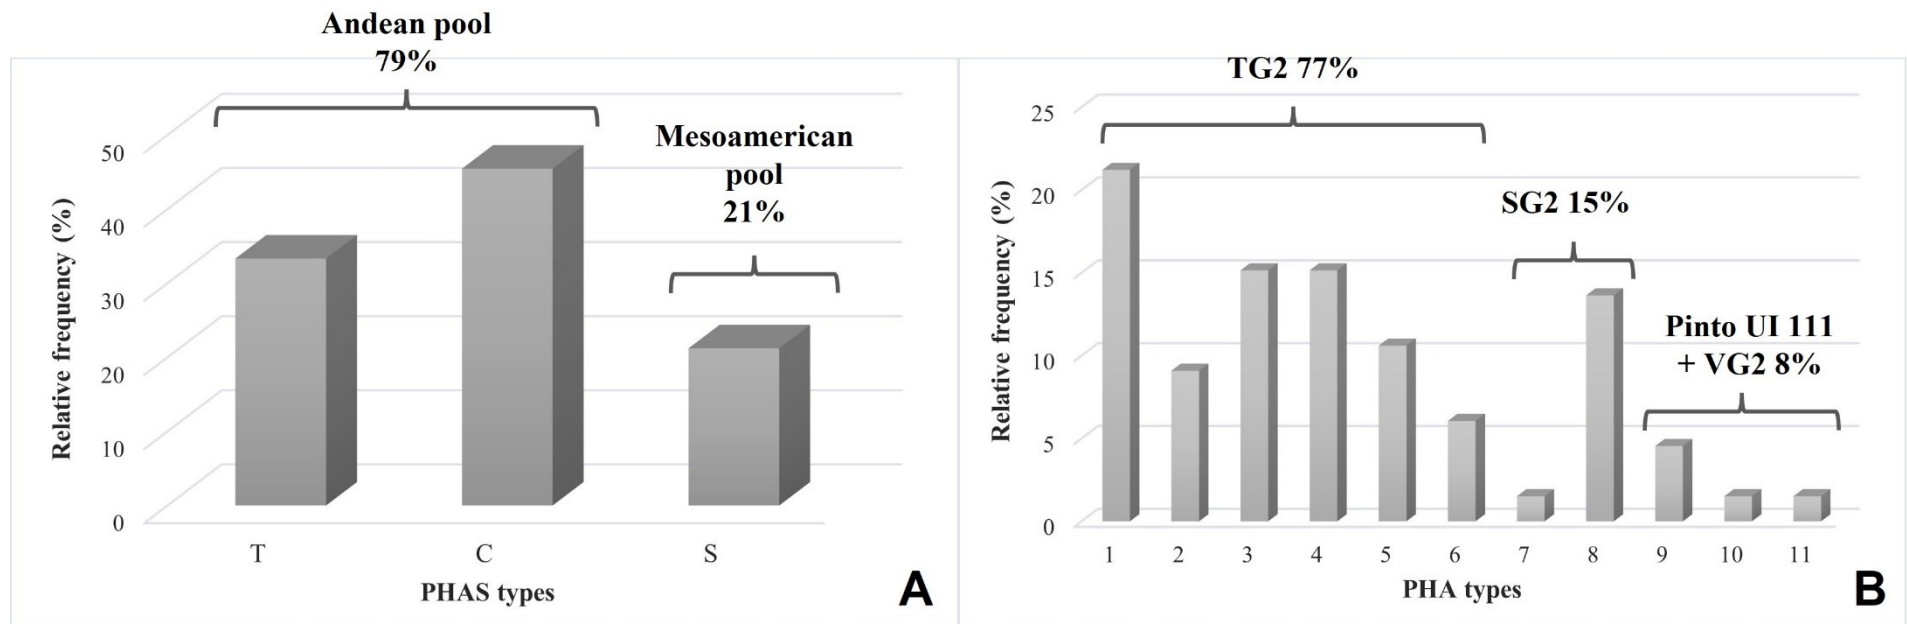

**Figure S5.** Frequency distribution of PHAS (A) and PHA (B) protein patterns within the 66 common bean landraces from the Lazio region. In the panel A is indicated the relative frequency of the C and T PHAS types associated to the Andean pool and that of the S PHAS type typical of the Mesoamerican pool. In the panel B are reported the relative frequencies of the four major variant groups TG2, SG2, Pinto UI 111 and VG2 [67], by which the 11 identified PHA patterns can be divided.

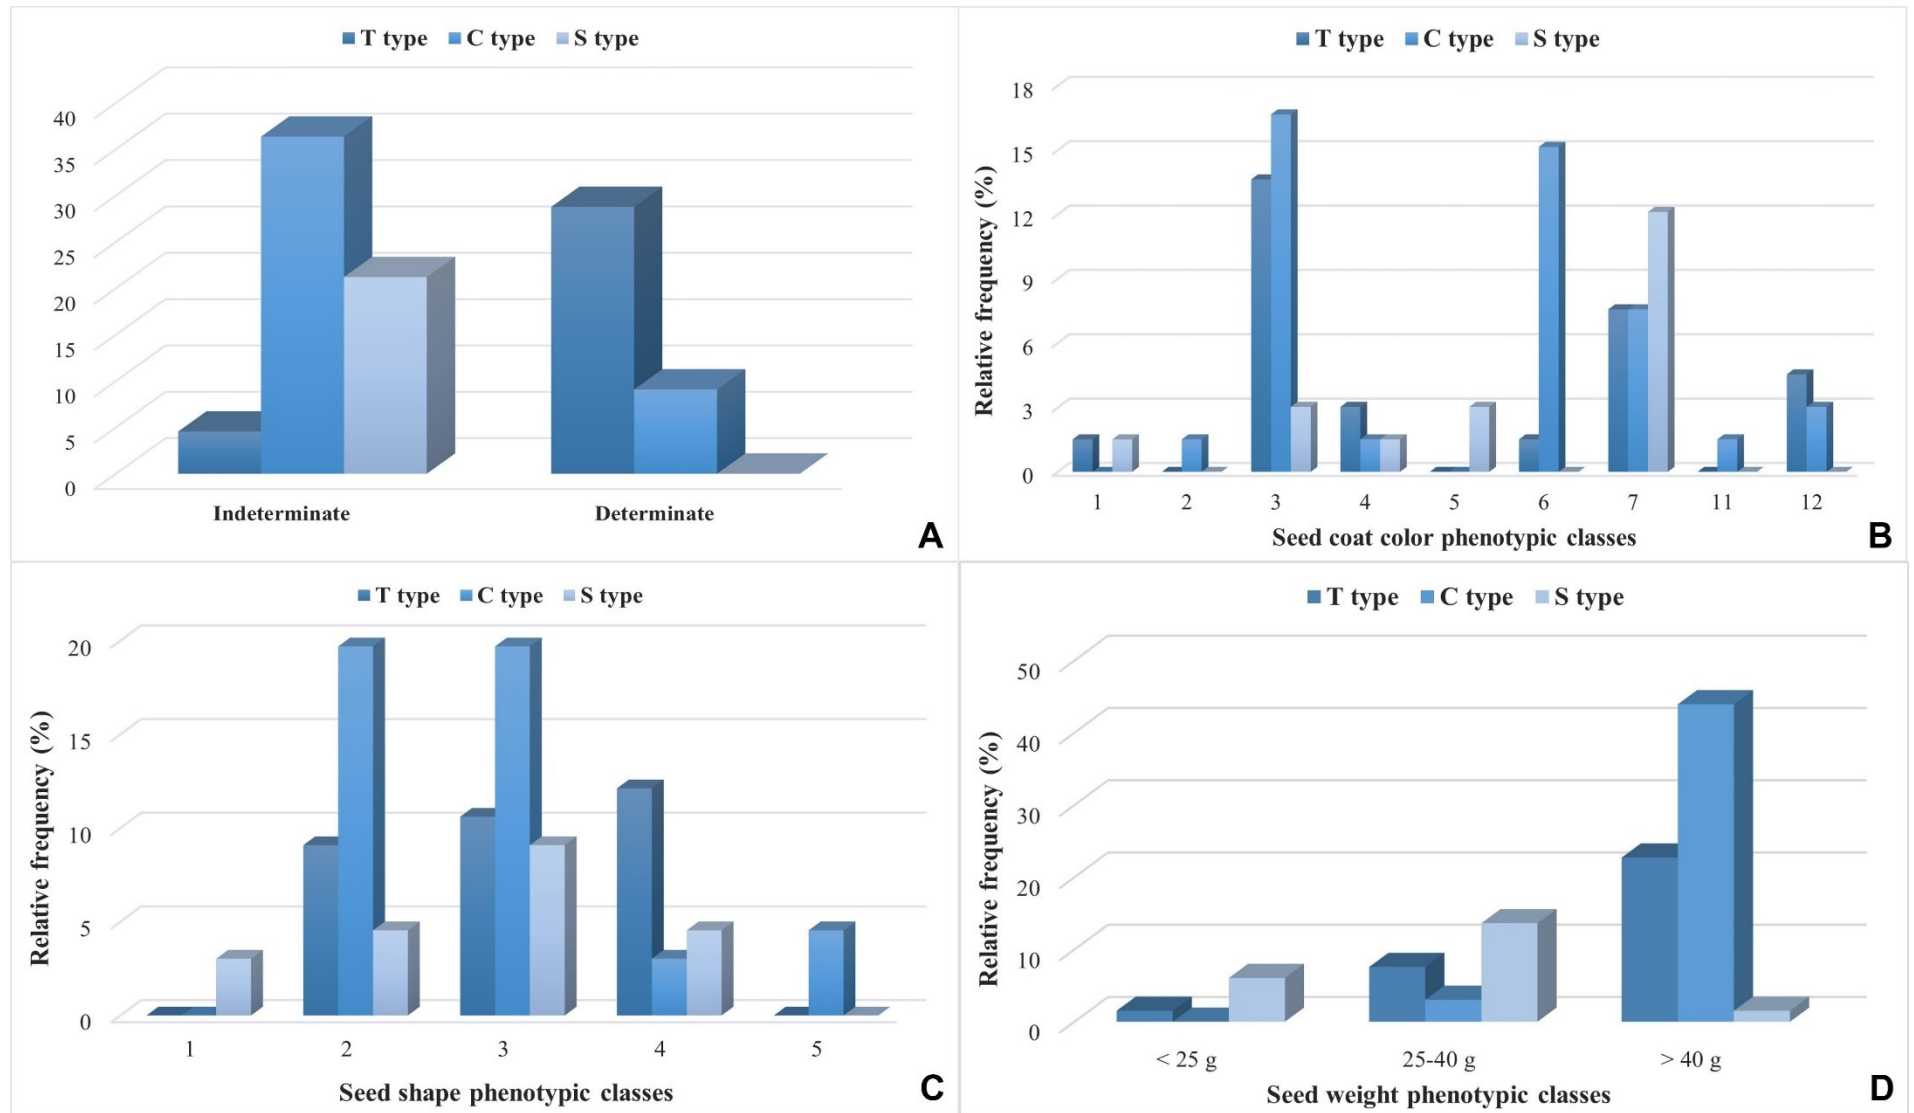

**Figure S6.** Frequency distribution of morphological traits in relationship with PHAS types in the landrace collection from Lazio region. A) Plant type: determinate and indeterminate growth habit. B) Seed coat color: 1= black; 2= brown, pale to dark; 3= maroon; 4= grey, brown to greenish; 5= yellow to greenish yellow; 6= pale-cream to buff (6); 7= pure white; 11= green to olive; 12= red. C) Seed shape: 1= round; 2= oval; 3= cuboid; 4= kidney shaped; 5= truncate fastigiata. D) Seed size: small (100 seed weight < 25 g), medium (25-40 g) and large (> 40 g).

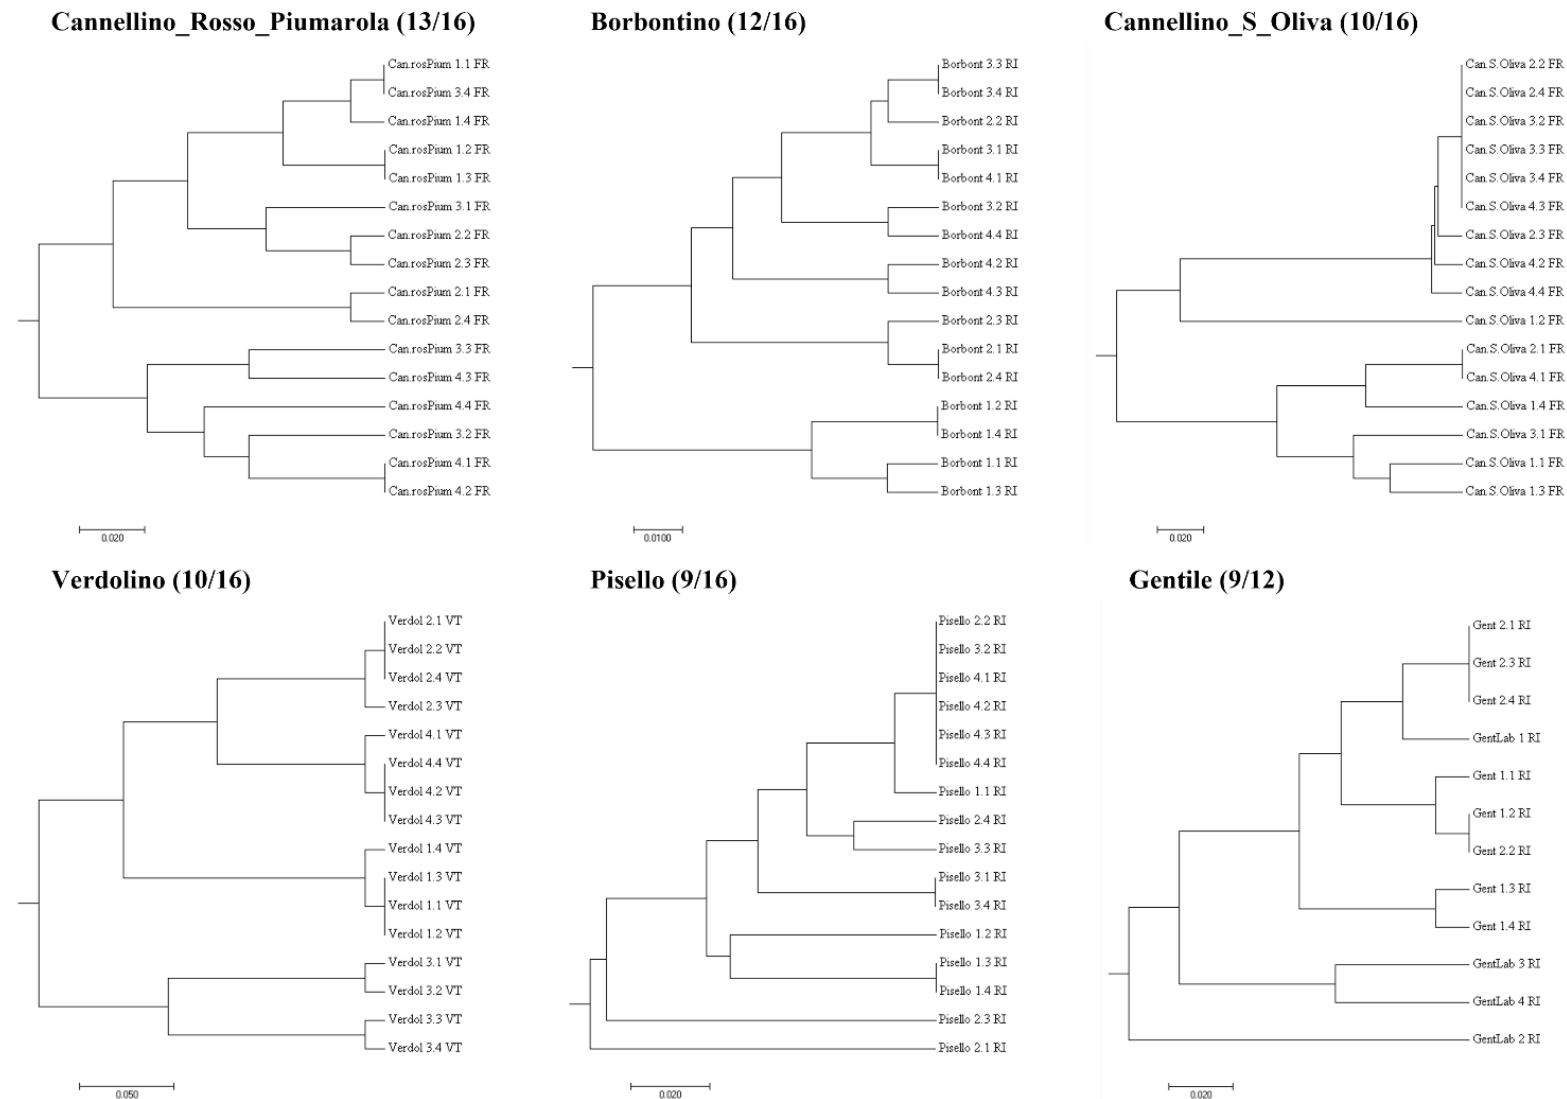

**Figure S7.** UPGMA trees based on Nei's coefficient [59] among the different plants analysed for six landraces showing the unique genotypes identified. For each landrace, the different genotypes on the total plants analysed are indicated in brackets.

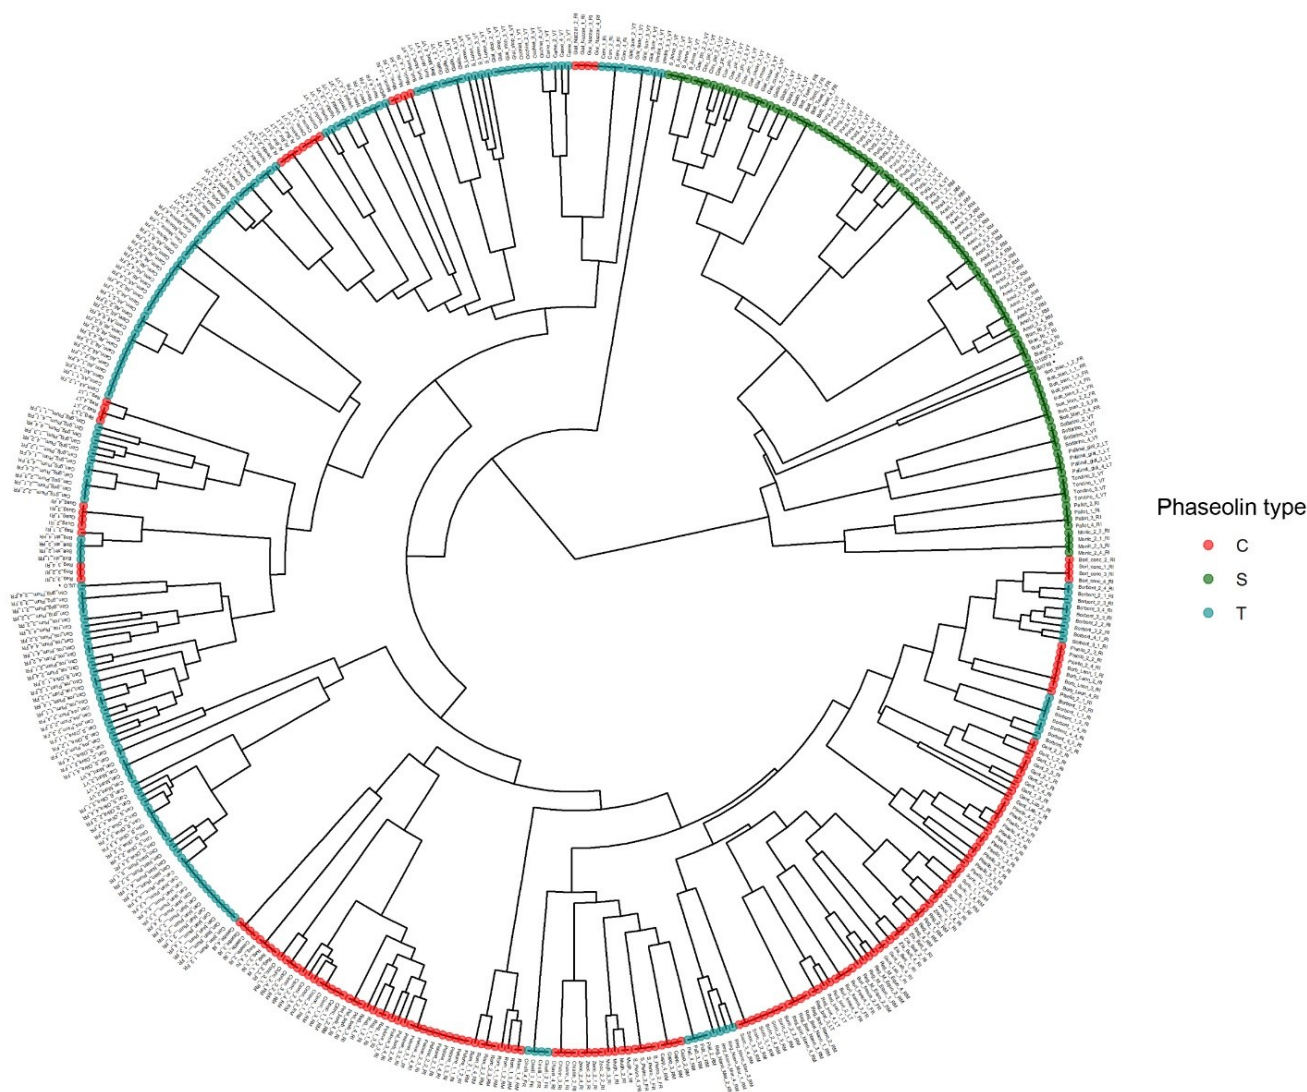

**Figure S8.** UPGMA tree based on Nei's coefficient [59] among the 456 genotypes (four plants for each of the 114 accessions belonging to 66 different landraces from the Lazio Region). In the phylogenetic tree, the red, light blue, and green circles indicate the genotypes with C, T and S PHAS types, respectively. The genotypes BAT and G12873 of Mesoamerica origin and MIDAS and JALO of Andean origin were included as references.

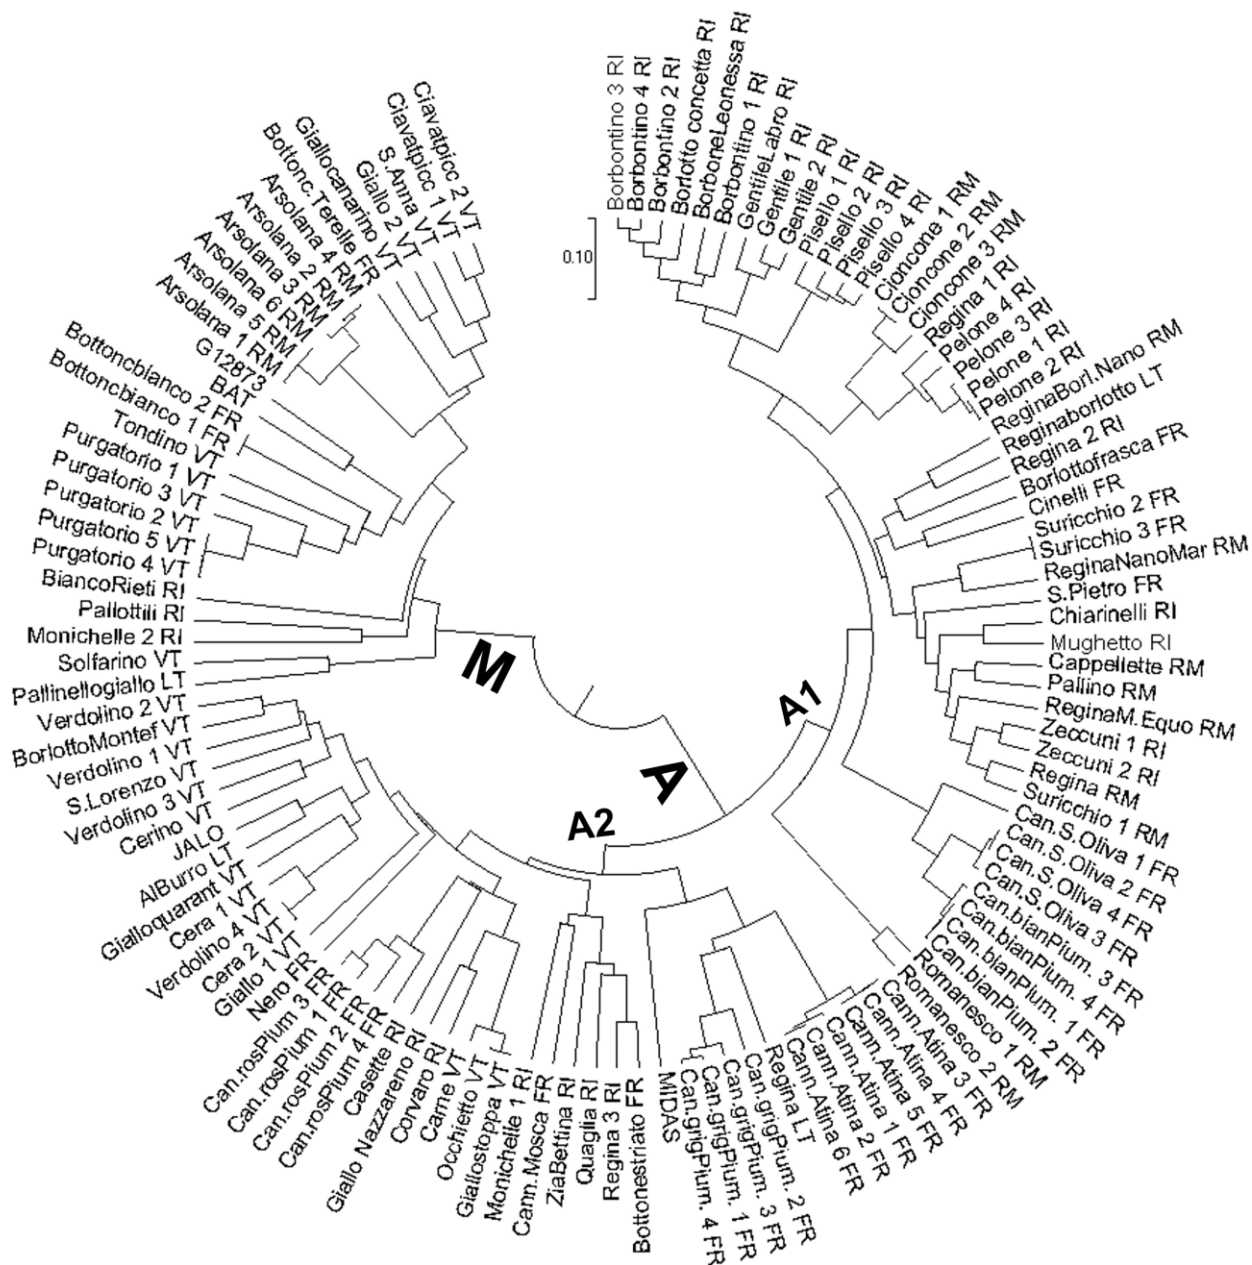

**Figure S9.** UPGMA tree based on Nei's coefficient [59] among the 114 accessions belonging to the 66 *P. vulgaris* landraces from Lazio Region. The genotypes BAT and G12873 of Mesoamerica origin and MIDAS and JALO of Andean origin were included as references.

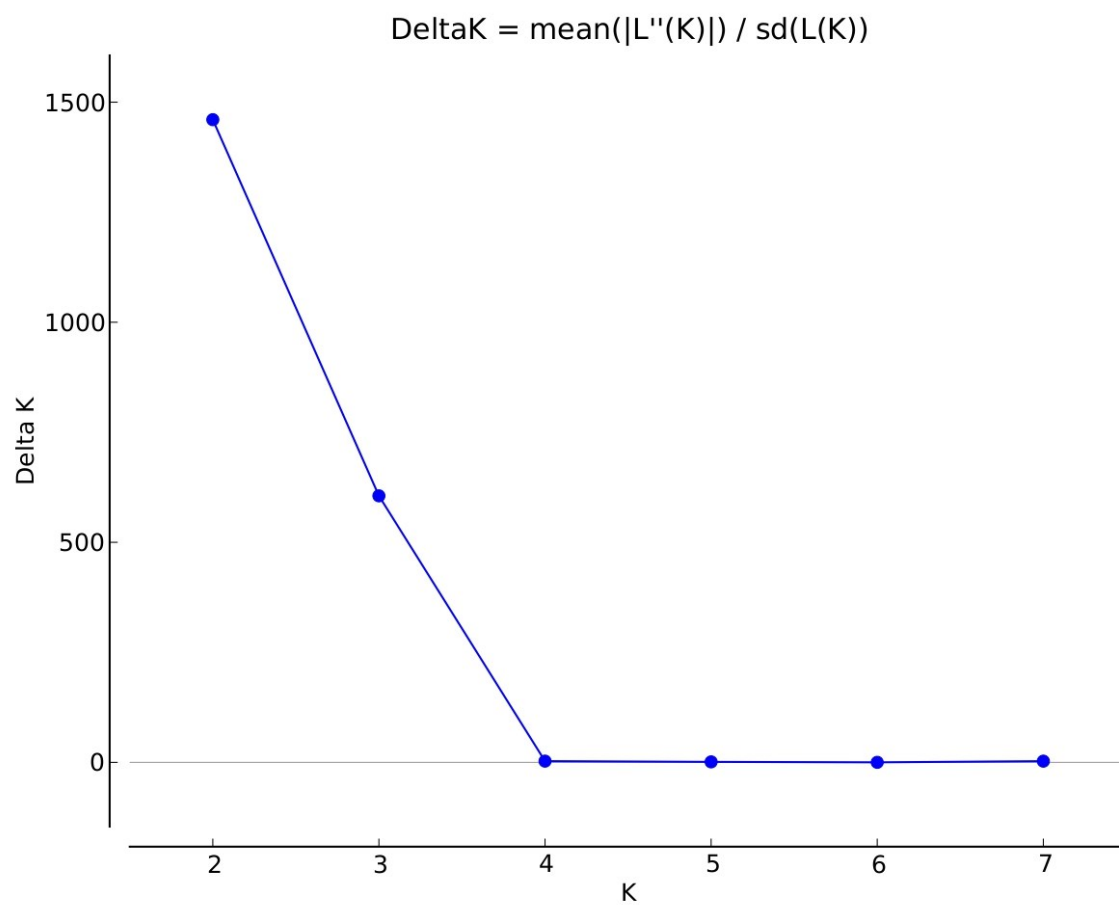

**Figure S10.** Estimation of the optimum number of clusters for the *P. vulgaris* genotypes according to the Evanno's method. The graph displays the DeltaK [ $\text{mean}(|L''(K)|) / \text{sd}(L(K))$ ] for each K value.

## Additional Tables

**Table S2.** Characteristics of the 12 microsatellite (SSR) markers used in this study.

| SSR Code | Genebank entry | Description                                                 | LG  | Forward primer                | Reverse primer               | Motif                              | Annealing (°C) | Dye color | References               |
|----------|----------------|-------------------------------------------------------------|-----|-------------------------------|------------------------------|------------------------------------|----------------|-----------|--------------------------|
| PV-ag003 | X04001         | Glutamine synthetase                                        | B01 | TCACGTACGAGTTGAATCTCAGGAT     | GGTGTCTGGAGAGGTTAAGGTTG      | (AG) <sub>8</sub>                  | 49             | FAM       | Yu et al. [50]           |
| BMd-20   | X74919         | Endochitinase                                               | B05 | CCGTTGCCTGTATTCCCCAT          | CTGGTGAAGTCATCTGGAGTGGTC     | (AT) <sub>5</sub>                  | 49             | JOE       | Yu et al. [50]           |
| PV-at007 | X80051         | NADP-dependent malic enzyme                                 | B09 | AGTTAAATTATACGAGGTTAGCCTAAATC | CATTCCCTTCACACATTCACCG       | (AT) <sub>12</sub>                 | 49             | TAMRA     | Yu et al. [50]           |
| PV-at003 | X60000         | Small subunit of ribulose biphosphate carboxylase/oxygenase | B04 | ACCTAGAGCCTAATCCTTCTGCGT      | GAATGTGAATATCAGAAAGCAAATGG   | (AT) <sub>4</sub> (T) <sub>2</sub> | 49             | JOE       | Yu et al. [50]           |
| PV-ag001 | M75856         | Pathogenesis-related protein 3                              | B11 | CAATCCTCTCTCTCATTTCCAATC      | GACCTTGAAGTCGGTGTCTGTTT      | (GA) <sub>11</sub>                 | 49             | FAM       | Yu et al. [50]           |
| PV-at004 | X61293         | Plastid-located glutamine synthetase (promotor region)      | B06 | AATCTGCCGAGAGTGGTCCTGC        | GATTGAAATATCAAAGAGAATTGTTACC | (AT) <sub>18</sub>                 | 48             | TAMRA     | Yu et al. [50]           |
| SHP1B    |                | Genomic clone for the SHATTERPROOF gene                     | B06 | GGAAATTGAGCTGCAAAACC          | CACAGTGTCCCTGCATCAT          |                                    | 52             | FAM       | Nanni et al. [51]        |
| BM160    | AF483876       | <i>P. vulgaris</i> genomic clone D137                       | B07 | CGTGCTTGGCGAATAGCTTTG         | CGCGGTTCTGATCGTGACTTC        | (GA) <sub>15</sub> (GAA)           | 52             | FAM       | Gaitan-Solis et al. [52] |
| BM210    | AF483902       | <i>P. vulgaris</i> genomic clone D922                       | B07 | CCCTCATCCTCCATTCTTATCG        | ACCACTGCAATCCTCATCTTTG       | (CT) <sub>15</sub>                 | 52             | TAMRA     | Gaitan-Solis et al. [52] |
| BM172    | AF483884       | <i>P. vulgaris</i> genomic clone D270                       | B03 | CTGTACCTCAAACAGGGCACT         | GCAATACCGCCATGAGAGAT         | (GA) <sub>23</sub>                 | 52             | JOE       | Gaitan-Solis et al. [52] |
| BMd-12   | AZ044945       | <i>P. vulgaris</i> genomic clone Bng225/R                   | B06 | CATCAACAAGGACAGCCTCA          | GCAGCTGGCGGGTAAAACAG         | (AGC) <sub>7</sub>                 | 52             | JOE       | Blair et al. [25]        |
| BM151    | AF483867       | <i>P. vulgaris</i> genomic clone D49                        | B08 | CACAACAAGAAAGACCTCCT          | TTATGTATTAGACCACATTACTTCC    | (TC) <sub>14</sub>                 | 50             | TAMRA     | Gaitan-Solis et al. [52] |

**Table S4.** Descriptive statistic of seed quantitative variables detected on 66 landraces from Lazio region. SL = seed length; SH = seed height; 100W = 100-seed weight; L/H ratio between seed length and height; SD= Standard Deviation, CV= Coefficient of Variation expressed as a percentage.

| Variable | Mean  | SD    | CV %  | Min   |            | Max    |                |
|----------|-------|-------|-------|-------|------------|--------|----------------|
|          |       |       |       | value | landrace   | value  | landrace       |
| SL       | 12.82 | 2.48  | 19.39 | 7.18  | Tondino_VT | 18.88  | Cinelli_FR     |
| SH       | 7.92  | 1.21  | 15.31 | 5.51  | Tondino_VT | 10.71  | Zia Bettina_RI |
| 100W     | 51.57 | 19.09 | 37.02 | 20.00 | Tondino_VT | 105.00 | Zia Bettina_RI |
| L/H      | 1.63  | 0.29  | 17.97 | 1.15  | Tondino_VT | 2.37   | Al burro_LT    |

**Table S5.** Genetic diversity parameters from the 12 SSR loci used for the analysis of the *P. vulgaris* collection from Lazio Region.

| <b>Locus</b> | <b>N<sub>a</sub><sup>a</sup></b> | <b>N<sub>e</sub><sup>b</sup></b> | <b>MAF<sup>c</sup></b> | <b>H<sub>o</sub><sup>d</sup></b> | <b>H<sub>e</sub><sup>e</sup></b> | <b>F<sup>f</sup></b> | <b>PIC<sup>g</sup></b> |
|--------------|----------------------------------|----------------------------------|------------------------|----------------------------------|----------------------------------|----------------------|------------------------|
| X04001       | 3.0                              | 1.754                            | 0.697                  | 0.000                            | 0.430                            | 1.000                | 0.348                  |
| X74919       | 2.0                              | 1.677                            | 0.719                  | 0.013                            | 0.404                            | 0.967                | 0.322                  |
| X80051       | 13.0                             | 4.114                            | 0.459                  | 0.037                            | 0.757                            | 0.951                | 0.743                  |
| AF483876     | 14.0                             | 8.082                            | 0.219                  | 0.037                            | 0.876                            | 0.958                | 0.864                  |
| X60000       | 3.0                              | 1.680                            | 0.724                  | 0.000                            | 0.405                            | 1.000                | 0.330                  |
| AF483902     | 7.0                              | 3.783                            | 0.313                  | 0.031                            | 0.736                            | 0.958                | 0.689                  |
| SHP1B        | 4.0                              | 3.698                            | 0.342                  | 0.018                            | 0.730                            | 0.976                | 0.680                  |
| AF483884     | 4.0                              | 2.935                            | 0.504                  | 0.000                            | 0.659                            | 1.000                | 0.611                  |
| X61293       | 14.0                             | 8.296                            | 0.223                  | 0.026                            | 0.879                            | 0.970                | 0.868                  |
| M75856       | 4.0                              | 2.817                            | 0.477                  | 0.011                            | 0.645                            | 0.983                | 0.580                  |
| AZ044945     | 2.0                              | 1.452                            | 0.807                  | 0.000                            | 0.311                            | 1.000                | 0.263                  |
| AF483867     | 5.0                              | 2.736                            | 0.482                  | 0.000                            | 0.635                            | 1.000                | 0.570                  |
| <b>Mean</b>  | 6.3                              | 3.585                            | 0.497                  | 0.014                            | 0.622                            | 0.977                | 0.572                  |
| <b>Total</b> | 75.0                             |                                  |                        |                                  |                                  |                      |                        |

<sup>a</sup>Number of observed alleles per locus; <sup>b</sup>effective number of alleles; <sup>c</sup>major allele frequency; <sup>d</sup>observed heterozygosity; <sup>e</sup>expected heterozygosity; <sup>f</sup>Inbreeding coefficient; <sup>g</sup>polymorphic information content.

**Table S6.** Genetic diversity parameters for the 66 landraces.

| <b>LANDRACE</b>        | <b>N<sup>a</sup></b> | <b>Nacc<sup>b</sup></b> | <b>Na<sup>c</sup></b> | <b>Ne<sup>d</sup></b> | <b>Npa<sup>e</sup></b> | <b>Ho<sup>f</sup></b> | <b>He<sup>g</sup></b> |
|------------------------|----------------------|-------------------------|-----------------------|-----------------------|------------------------|-----------------------|-----------------------|
| 1 Cappellette_RM       | 4                    | 1                       | 1.000                 | 1.000                 | 1                      | 0.000                 | 0.000                 |
| 2 Suricchio_2_FR       | 8                    | 2                       | 1.000                 | 1.000                 | 1                      | 0.000                 | 0.000                 |
| 3 Pallino_RM           | 4                    | 1                       | 1.000                 | 1.000                 | 0                      | 0.000                 | 0.000                 |
| 4 Regina Borl.Nano_RM  | 4                    | 1                       | 1.000                 | 1.000                 | 0                      | 0.000                 | 0.000                 |
| 5 Pallinello giallo_LT | 4                    | 1                       | 1.000                 | 1.000                 | 0                      | 0.000                 | 0.000                 |
| 6 Al Burro_LT          | 4                    | 1                       | 1.000                 | 1.000                 | 0                      | 0.000                 | 0.000                 |
| 7 Giallo Nazzareno_RI  | 4                    | 1                       | 1.000                 | 1.000                 | 0                      | 0.000                 | 0.000                 |
| 8 Borlotto_concetta_RI | 4                    | 1                       | 1.000                 | 1.000                 | 0                      | 0.000                 | 0.000                 |
| 9 Chiarinelli_RI       | 4                    | 1                       | 1.000                 | 1.000                 | 0                      | 0.000                 | 0.000                 |
| 10 Corvaro_RI          | 4                    | 1                       | 1.000                 | 1.000                 | 0                      | 0.000                 | 0.000                 |
| 11 Bianco Rieti_RI     | 4                    | 1                       | 1.000                 | 1.000                 | 0                      | 0.000                 | 0.000                 |
| 12 Quaglia_RI          | 4                    | 1                       | 1.000                 | 1.000                 | 0                      | 0.000                 | 0.000                 |
| 13 Borbone Leonessa_RI | 4                    | 1                       | 1.000                 | 1.000                 | 0                      | 0.000                 | 0.000                 |
| 14 Casette_RI          | 4                    | 1                       | 1.000                 | 1.000                 | 0                      | 0.000                 | 0.000                 |
| 15 Regina_2_RI         | 4                    | 1                       | 1.000                 | 1.000                 | 0                      | 0.000                 | 0.000                 |
| 16 Monichelle_2_RI     | 4                    | 1                       | 1.000                 | 1.000                 | 0                      | 0.000                 | 0.000                 |
| 17 Pallottili_RI       | 4                    | 1                       | 1.000                 | 1.000                 | 0                      | 0.000                 | 0.000                 |
| 18 Bottonc bianco_FR   | 8                    | 2                       | 1.000                 | 1.000                 | 0                      | 0.000                 | 0.000                 |
| 19 Borlotto frasca_FR  | 4                    | 1                       | 1.000                 | 1.000                 | 0                      | 0.000                 | 0.000                 |
| 20 Bottonc. Terelle_FR | 4                    | 1                       | 1.000                 | 1.000                 | 0                      | 0.000                 | 0.000                 |
| 21 Cann. Mosca_FR      | 4                    | 1                       | 1.000                 | 1.000                 | 0                      | 0.000                 | 0.000                 |
| 22 Cinelli_FR          | 4                    | 1                       | 1.000                 | 1.000                 | 0                      | 0.000                 | 0.000                 |
| 23 S.Pietro_FR         | 4                    | 1                       | 1.000                 | 1.000                 | 1                      | 0.000                 | 0.000                 |
| 24 Nero_FR             | 4                    | 1                       | 1.000                 | 1.000                 | 0                      | 0.000                 | 0.000                 |
| 25 Giallo stoppa_VT    | 4                    | 1                       | 1.000                 | 1.000                 | 0                      | 0.000                 | 0.000                 |
| 26 Giallo quarant_VT   | 4                    | 1                       | 1.000                 | 1.000                 | 0                      | 0.000                 | 0.000                 |
| 27 Giallo canarino_VT  | 4                    | 1                       | 1.000                 | 1.000                 | 0                      | 0.000                 | 0.000                 |
| 28 Giallo_1_VT         | 4                    | 1                       | 1.000                 | 1.000                 | 0                      | 0.000                 | 0.000                 |
| 29 Occhietto_VT        | 4                    | 1                       | 1.000                 | 1.000                 | 0                      | 0.000                 | 0.000                 |
| 30 S.Anna_VT           | 4                    | 1                       | 1.000                 | 1.000                 | 0                      | 0.000                 | 0.000                 |
| 31 Cerino_VT           | 4                    | 1                       | 1.000                 | 1.000                 | 0                      | 0.000                 | 0.000                 |
| 32 Borlotto Montef_VT  | 4                    | 1                       | 1.000                 | 1.000                 | 0                      | 0.000                 | 0.000                 |
| 33 Solfarino_VT        | 4                    | 1                       | 1.000                 | 1.000                 | 0                      | 0.000                 | 0.000                 |
| 34 Tondino_VT          | 4                    | 1                       | 1.000                 | 1.000                 | 0                      | 0.000                 | 0.000                 |
| 35 Bottone striato_FR  | 4                    | 1                       | 1.083                 | 1.050                 | 0                      | 0.000                 | 0.031                 |
| 36 Cera_VT             | 8                    | 2                       | 1.083                 | 1.083                 | 0                      | 0.000                 | 0.042                 |
| 37 Suricchio_1_RM      | 4                    | 1                       | 1.083                 | 1.023                 | 0                      | 0.021                 | 0.018                 |
| 38 Regina_RM           | 4                    | 1                       | 1.083                 | 1.023                 | 0                      | 0.021                 | 0.018                 |
| 39 Regina_LT           | 4                    | 1                       | 1.083                 | 1.023                 | 0                      | 0.021                 | 0.018                 |
| 40 Zia Bettina_RI      | 4                    | 1                       | 1.083                 | 1.023                 | 0                      | 0.021                 | 0.018                 |
| 41 Regina_3_RI         | 4                    | 1                       | 1.083                 | 1.023                 | 0                      | 0.021                 | 0.018                 |
| 42 Cann. Atina_FR      | 24                   | 6                       | 1.083                 | 1.083                 | 0                      | 0.010                 | 0.042                 |
| 43 Regina borlotto_LT  | 4                    | 1                       | 1.083                 | 1.074                 | 0                      | 0.021                 | 0.039                 |
| 44 Mughetto_RI         | 4                    | 1                       | 1.083                 | 1.074                 | 1                      | 0.021                 | 0.039                 |
| 45 Regina_1_RI         | 4                    | 1                       | 1.083                 | 1.074                 | 0                      | 0.021                 | 0.039                 |
| 46 Monichelle_1_RI     | 4                    | 1                       | 1.083                 | 1.074                 | 0                      | 0.021                 | 0.039                 |
| 47 Giallo_2_VT         | 4                    | 1                       | 1.083                 | 1.074                 | 0                      | 0.021                 | 0.039                 |
| 48 Can.bian Pium_FR    | 16                   | 4                       | 1.167                 | 1.022                 | 0                      | 0.010                 | 0.019                 |
| 49 Zeccuni_RI          | 8                    | 1                       | 1.250                 | 1.204                 | 0                      | 0.010                 | 0.111                 |
| 50 Regina Nano Mar_RM  | 4                    | 1                       | 1.167                 | 1.147                 | 1                      | 0.042                 | 0.078                 |
| 51 Carne_VT            | 4                    | 1                       | 1.167                 | 1.147                 | 0                      | 0.042                 | 0.078                 |
| 52 S.Lorenzo_VT        | 4                    | 1                       | 1.250                 | 1.230                 | 0                      | 0.042                 | 0.120                 |
| 53 Regina M.Equo_RM    | 4                    | 1                       | 1.250                 | 1.120                 | 0                      | 0.063                 | 0.076                 |
| 54 Pelone_RI           | 16                   | 4                       | 1.167                 | 1.060                 | 0                      | 0.010                 | 0.043                 |
| 55 Arsolana_RM         | 24                   | 6                       | 1.167                 | 1.093                 | 2                      | 0.010                 | 0.051                 |
| 56 Romanesco_RM        | 8                    | 2                       | 1.250                 | 1.118                 | 0                      | 0.031                 | 0.070                 |
| 57 Purgatorio_VT       | 20                   | 5                       | 1.333                 | 1.219                 | 3                      | 0.008                 | 0.112                 |
| 58 Ciavat picc_VT      | 8                    | 1                       | 1.167                 | 1.162                 | 0                      | 0.021                 | 0.082                 |
| 59 Cioncone_RM         | 12                   | 3                       | 1.250                 | 1.132                 | 0                      | 0.028                 | 0.086                 |
| 60 Can.grig Pium_FR    | 16                   | 4                       | 1.333                 | 1.276                 | 1                      | 0.021                 | 0.130                 |
| 61 Gentile_RI          | 12                   | 3                       | 1.417                 | 1.195                 | 1                      | 0.028                 | 0.129                 |
| 62 Pisello_RI          | 16                   | 4                       | 1.333                 | 1.160                 | 1                      | 0.031                 | 0.107                 |
| 63 Verdolino_VT        | 16                   | 4                       | 1.917                 | 1.595                 | 1                      | 0.026                 | 0.251                 |
| 64 Can.S.Oliva_FR      | 16                   | 4                       | 1.667                 | 1.338                 | 0                      | 0.031                 | 0.191                 |
| 65 Borbontino_RI       | 16                   | 4                       | 1.333                 | 1.178                 | 0                      | 0.036                 | 0.111                 |
| 66 Can.ros Pium_FR     | 16                   | 4                       | 1.583                 | 1.352                 | 0                      | 0.031                 | 0.169                 |

<sup>a</sup>Number of individual analyzed for each landrace; <sup>b</sup>Number of accessions for each landrace; <sup>c</sup>Number of alleles per locus; <sup>d</sup>Number of effective alleles; <sup>e</sup>Number of private alleles; <sup>f</sup>observed heterozygosity; <sup>g</sup>expected heterozygosity.

**Table S7.** Rare and private alleles detected on accessions of different landraces in homozygous (Hom) or heterozygous (Het) status.

| LOCUS  | Allele <sup>a</sup> | Frequency | Accession name <sup>b</sup> | Arsial code | Landrace              | Status  |
|--------|---------------------|-----------|-----------------------------|-------------|-----------------------|---------|
| X04001 | 165*                | 0.0132    | Purgatorio_1 (4)            | VE183_VT    | Purgatorio            | Hom     |
|        |                     |           | Purgatorio_3 (2)            | VE187_VT    | Purgatorio            | Hom     |
| X80051 | 200                 | 0.0285    | Bott. Striato (4)           | VE230_FR    | Bott. Striato         | Hom     |
|        |                     |           | Nero (4)                    | VE238_FR    | Nero                  | Hom     |
|        |                     |           | Cann. Rosso Piumarola_3 (2) | VE120_FR    | Cann. Rosso Piumarola | Hom/Het |
|        |                     |           | Cann. Rosso Piumarola_4 (3) | VE233_FR    | Cann. Rosso Piumarola | Hom/Het |
|        | 204                 | 0.0241    | Chiarinelli (4)             | VE263_RI    | Chiarinelli           | Hom     |
|        |                     |           | Corvaro (4)                 | VE273_RI    | Corvaro               | Hom     |
|        |                     |           | Zeccuni_2 (3)               | 3pg_RI      | Zeccuni               | Hom     |
|        | 206                 | 0.0285    | Bott. Terelle (4)           | VE287_FR    | Bottoncino Terelle    | Hom     |
|        |                     |           | Purgatorio_1 (4)            | VE183_VT    | Purgatorio            | Hom     |
|        |                     |           | Purgatorio_3 (1)            | VE187_VT    | Purgatorio            | Het     |
|        |                     |           | S. Lorenzo (2)              | VE425_VT    | San Lorenzo           | Hom     |
|        |                     |           | Cioncone_3 (2)              | VE243_RM    | Cioncone              | Hom     |
|        | 214*                | 0.0339    | Purgatorio_2 (4)            | VE185_VT    | Purgatorio            | Hom     |
|        |                     |           | Purgatorio_3 (4)            | VE187_VT    | Purgatorio            | Hom/Het |
|        |                     |           | Purgatorio_4 (4)            | VE422_VT    | Purgatorio            | Hom     |
|        |                     |           | Purgatorio_5 (4)            | VE184_VT    | Purgatorio            | Hom     |
|        | 218                 | 0.0351    | Monichelle_1 (4)            | 6pg_RI      | Monichelle_1          | Hom     |
|        |                     |           | Monichelle_2 (4)            | 8pg_RI      | Monichelle_2          | Hom     |
|        |                     |           | Cinelli (4)                 | VE383_FR    | Cinelli               | Hom     |
|        |                     |           | S. Pietro (4)               | VE384_FR    | San Pietro            | Hom     |
|        | 220                 | 0.0329    | Arsolana_2 (4)              | VE469_RM    | Arsolana              | Hom/Het |
|        |                     |           | Arsolana_3 (4)              | VE470_RM    | Arsolana              | Hom     |
|        |                     |           | Arsolana_4 (4)              | VE471_RM    | Arsolana              | Hom/Het |
|        |                     |           | Pallino (4)                 | VE215_RM    | Pallino               | Hom     |
|        | 224                 | 0.0153    | Cappellette (4)             | VE213_RM    | Cappellette           | Hom     |
|        |                     |           | Mughetto (3)                | VE269_RI    | Mughetto              | Hom/Het |
|        |                     |           | Romanesco_1 (1)             | VE217_RM    | Romanesco             | Het     |
|        | 228                 | 0.0285    | Arsolana_1 (4)              | VE468_RM    | Arsolana              | Hom     |
|        |                     |           | Arsolana_5 (4)              | VE478_RM    | Arsolana              | Hom     |
|        |                     |           | Arsolana_6 (4)              | VE244_RM    | Arsolana              | Hom     |
|        |                     |           | Mughetto (1)                | VE269_RI    | Mughetto              | Hom     |

| LOCUS    | Allele <sup>a</sup> | Frequency | Accession name <sup>b</sup> | Arsial code | Landrace                    | Status  |
|----------|---------------------|-----------|-----------------------------|-------------|-----------------------------|---------|
| AF483876 | 186                 | 0.0175    | Solfarino (4)               | VE196_VT    | Solfarino                   | Hom     |
|          |                     |           | Ciavattone piccolo_1 (3)    | VE179_VT    | Ciavattone piccolo          | Hom/Het |
|          |                     |           | Ciavattone piccolo_2 (1)    | VE180_VT    | Ciavattone piccolo          | Hom     |
|          | 224                 | 0.0417    | Pisello_1 (4)               | VE294_RI    | Pisello                     | Hom     |
|          |                     |           | Pisello_2 (3)               | VE295_RI    | Pisello                     | Hom/Het |
|          |                     |           | Pisello_3 (2)               | VE385_RI    | Pisello                     | Hom/Het |
|          |                     |           | Pisello_4 (4)               | VE386_RI    | Pisello                     | Hom     |
|          |                     |           | Gentile_1 (3)               | VE274_RI    | Gentile                     | Hom/Het |
|          |                     |           | Cann. S.Oliva_1 (3)         | VE132_FR    | Cannellino S. Oliva         | Hom/Het |
|          |                     |           | Cann. S.Oliva_2 (1)         | VE135_FR    | Cannellino S. Oliva         | Hom     |
|          |                     |           | Cann. S.Oliva_4 (1)         | VE137_FR    | Cannellino S. Oliva         | Hom     |
|          | 228*                | 0.0175    | Suricchio_2 (4)             | VE458_FR    | Suricchio_2_FR              | Hom     |
|          |                     |           | Suricchio_3 (4)             | VE459_FR    | Suricchio_2_FR              | Hom     |
|          | 238                 | 0.0351    | Romanesco_1 (4)             | VE217_RM    | Romanesco                   | Hom     |
|          |                     |           | Romanesco_2 (4)             | VE222_RM    | Romanesco                   | Hom     |
|          |                     |           | Regina Borlotto Nano_RM (4) | VE225_RM    | Regina Borlotto Nano_RM     | Hom     |
|          |                     |           | Cinelli (4)                 | VE383_FR    | Cinelli                     | Hom     |
|          | 242                 | 0.0175    | Regina_LT (4)               | VE483_LT    | Regina_LT                   | Hom     |
|          |                     |           | Regina Borlotto_LT (4)      | VE487_LT    | Regina Borlotto_LT          | Hom     |
|          | 250*                | 0.0087    | Reg Nano Marano Equo (4)    | VE226_RM    | Regina Nano Marano Equo     | Hom     |
|          | 256*                | 0.0131    | Cann. Grigio Pium_1 (1)     | VE128_FR    | Cannellino Grigio Piumarola | Hom     |
|          |                     |           | Cann. Grigio Pium_2 (4)     | VE129_FR    | Cannellino Grigio Piumarola | Hom     |
|          |                     |           | Cann. Grigio Pium_4 (1)     | VE232_FR    | Cannellino Grigio Piumarola | Hom     |
| X60000   | 141*                | 0.0087    | San Pietro (4)              | VE384_FR    | San Pietro                  | Hom     |
| AF483902 | 164*                | 0.0219    | Gentile_1 (4)               | VE274_RI    | Gentile                     | Hom     |
|          |                     |           | Gentile_2 (4)               | VE423_RI    | Gentile                     | Hom     |
|          |                     |           | Gentile Labro (2)           | 13pg_RI     | Gentile                     | Hom     |
|          | 170                 | 0.0417    | Pisello_1 (2)               | VE294_RI    | Pisello                     | Hom/Het |
|          |                     |           | Pisello_2 (3)               | VE295_RI    | Pisello                     | Hom     |
|          |                     |           | Pisello_3 (4)               | VE385_RI    | Pisello                     | Hom     |
|          |                     |           | Pisello_4 (4)               | VE386_RI    | Pisello                     | Hom     |
|          |                     |           | Bianco di Rieti (4)         | VE275_RI    | Bianco di Rieti             | Hom     |
|          |                     |           | Giallo_2_VT (3)             | VE248_VT    | Giallo_2_VT                 | Hom/Het |
|          |                     |           |                             |             |                             |         |
|          | 180*                | 0.0022    | Verdolino_3 (1)             | VE191_VT    | Verdolino                   | Hom     |

| LOCUS    | Allele <sup>a</sup> | Frequency | Accession name <sup>b</sup> | Arsial code | Landrace                   | Status  |
|----------|---------------------|-----------|-----------------------------|-------------|----------------------------|---------|
| AF483902 | 186*                | 0.0526    | Arsolana_1 (4)              | VE468_RM    | Arsolana                   | Hom     |
|          |                     |           | Arsolana_2 (4)              | VE469_RM    | Arsolana                   | Hom     |
|          |                     |           | Arsolana_3 (4)              | VE470_RM    | Arsolana                   | Hom     |
|          |                     |           | Arsolana_4 (4)              | VE471_RM    | Arsolana                   | Hom     |
|          |                     |           | Arsolana_5 (4)              | VE478_RM    | Arsolana                   | Hom     |
|          |                     |           | Arsolana_6 (4)              | VE244_RM    | Arsolana                   | Hom     |
| X61293   | 160*                | 0.0109    | Purgatorio_2 (1)            | VE185_VT    | Purgatorio                 | Het     |
|          |                     |           | Purgatorio_3 (4)            | VE422_VT    | Purgatorio                 | Hom     |
|          | 168                 | 0.0417    | Romanesco_1 (4)             | VE217_RM    | Romanesco                  | Hom     |
|          |                     |           | Romanesco_2 (4)             | VE222_RM    | Romanesco                  | Hom     |
|          |                     |           | Regina_2_RI (4)             | 5pg_RI      | Regina_2_RI                | Hom     |
|          |                     |           | Cerino (4)                  | VE340_VT    | Cerino                     | Hom     |
|          |                     |           | Cann. Rosso Piumarola_2 (3) | VE117_FR    | Cannellino Rosso Piumarola | Hom     |
|          | 178                 | 0.0406    | Cann. Rosso Pimarola_4 (4)  | VE233_FR    | Cannellino Rosso Piumarola | Hom     |
|          |                     |           | Cera_1 (4)                  | VE427_VT    | Cera                       | Hom     |
|          |                     |           | Regina_LT (4)               | VE483_LT    | Regina_LT                  | Hom     |
|          |                     |           | S. Pietro (4)               | VE384_FR    | San Pietro                 | Hom     |
|          |                     |           | Regina M. Equo (3)          | VE224_RM    | Regina Marano Equo_RM      | Hom/Het |
|          | 182*                | 0.0087    | Cappellette (4)             | VE213_RM    | Cappellette                | Hom     |
|          | 188*                | 0.0263    | Pisello_1 (4)               | VE294_RI    | Pisello                    | Hom     |
|          |                     |           | Pisello_2 (1)               | VE295_RI    | Pisello                    | Hom     |
|          |                     |           | Pisello_3 (3)               | VE385_RI    | Pisello                    | Hom     |
|          |                     |           | Pisello_4 (4)               | VE386_RI    | Pisello                    | Hom     |
|          | 194*                | 0.0087    | Mughetto (4)                | VE269_RI    | Mughetto                   | Hom     |
| M75856   | 149                 | 0.0263    | Suricchio_1 (4)             | VE457_RM    | Suricchio_1_RM             | Hom     |
|          |                     |           | Regina_1_RM (4)             | VE216_RM    | Regina_RM                  | Hom     |
|          |                     |           | Regina Marano Equo_RM (4)   | VE224_RM    | Regina Marano Equo_RM      | Hom     |

| LOCUS    | Allele <sup>a</sup> | Frequency | Accession name <sup>b</sup> | Arsial code | Landrace        | Status |
|----------|---------------------|-----------|-----------------------------|-------------|-----------------|--------|
| AF483867 | 151                 | 0.0438    | Zia Bettina (4)             | 4pg_RI      | Zia Bettina     | Hom    |
|          |                     |           | Monichelle_2 (4)            | 8pg_RI      | Monichelle_2    | Hom    |
|          |                     |           | Giallo Canarino (4)         | VE198_VT    | Giallo Canarino | Hom    |
|          |                     |           | Giallo_2 (4)                | VE248_VT    | Giallo_2        | Hom    |
|          |                     |           | S. Anna (4)                 | VE258_VT    | S. Anna         | Hom    |
|          | 155*                | 0.0526    | Arsolana_1 (4)              | VE468_RM    | Arsolana        | Hom    |
|          |                     |           | Arsolana_2 (4)              | VE469_RM    | Arsolana        | Hom    |
|          |                     |           | Arsolana_3 (4)              | VE470_RM    | Arsolana        | Hom    |
|          |                     |           | Arsolana_4 (4)              | VE471_RM    | Arsolana        | Hom    |
|          |                     |           | Arsolana_5 (4)              | VE478_RM    | Arsolana        | Hom    |
|          |                     |           | Arsolana_6 (4)              | VE244_RM    | Arsolana        | Hom    |

<sup>a</sup> The asterisk indicates the private alleles

<sup>b</sup> In brackets are indicated the individuals for each accession with that particular allele

**Table S8.** Analysis of molecular variance among and within landraces.

| Source           | df  | SS      | Est. Var. | %   | $\Phi$ -statistic | P( $\Phi$ ) |
|------------------|-----|---------|-----------|-----|-------------------|-------------|
| Among landraces  | 65  | 3062.72 | 3.41      | 89  | 0.887             | <0.001      |
| Within landraces | 846 | 341.91  | 0.40      | 11  |                   |             |
| Total            | 911 | 3404.63 | 3.82      | 100 |                   |             |

df: degree of freedom; SS: sum of square calculated from a square genetic distance matrix; Est.Var.: estimated variance. P( $\Phi$ )— $\Phi$ -statistic probability level after 999 permutations.

**Table S9.** Number of alleles and different genotypes detected in the 32 landraces showing intra-genetic diversity.

| Landrace      | N. of accession analysed | Loci                                                | N. of alleles/locus   | Number of different genotypes |
|---------------|--------------------------|-----------------------------------------------------|-----------------------|-------------------------------|
| Arsolana      | 6                        | X80051<br>AF483876                                  | 2<br>2                | 5                             |
| Cioncone      | 3                        | X80051<br>X61293<br>M75856                          | 2<br>2<br>2           | 8                             |
| Romanesco     | 2                        | X74919<br>X80051<br>AF483884                        | 2<br>2<br>2           | 5                             |
| Suricchio1_RM | 1                        | X74919                                              | 2                     | 2                             |
| Regina_RM     | 1                        | SHP1B                                               | 2                     | 2                             |
| ReginaME_RM   | 1                        | AF483902<br>SHP1B<br>X61293                         | 2<br>2<br>2           | 4                             |
| ReginaNME_RM  | 1                        | SHP1B<br>M75856                                     | 2<br>2                | 4                             |
| Regina_LT     | 1                        | AF483902                                            | 2                     | 2                             |
| Reginabor_LT  | 1                        | AF483902                                            | 2                     | 3                             |
| Pelone        | 4                        | X74919<br>AF483902                                  | 2<br>2                | 5                             |
| Borbontino    | 4                        | X80051<br>AF483902<br>X61293<br>M75856              | 2<br>2<br>2<br>2      | 12                            |
| Pisello       | 4                        | AF483876<br>AF483902<br>SHP1B<br>X61293             | 2<br>2<br>2<br>2      | 9                             |
| Gentile       | 3                        | X74919<br>AF483876<br>AF483902<br>SHP1B<br>AF483884 | 2<br>2<br>2<br>2<br>2 | 9                             |
| Mughetto      | 1                        | X80051                                              | 2                     | 3                             |
| Regina1_RI    | 1                        | AF483876                                            | 2                     | 3                             |
| Zeccuni       | 2                        | X04001<br>X80051<br>X61293                          | 2<br>2<br>2           | 4                             |
| Zia Bettina   | 1                        | AF483802                                            | 2                     | 2                             |

(Table S9 continued)

| Landrace          | N. of accession analysed | Loci     | N. of alleles/locus | Number of different genotypes |
|-------------------|--------------------------|----------|---------------------|-------------------------------|
| Monichelle1_RI    | 1                        | SHP1B    | 2                   | 3                             |
| Regina3_RI        | 1                        | AF483802 | 2                   | 2                             |
| Cann.Atina        | 6                        | AF483876 | 2                   | 3                             |
| Can.bianco Pium 4 |                          | AF483876 | 2                   | 4                             |
|                   |                          | SHP1B    | 2                   |                               |
| Can.grigio Pium   | 4                        | X80051   | 2                   | 8                             |
|                   |                          | AF483876 | 2                   |                               |
|                   |                          | AF483884 | 3                   |                               |
| Can.S.Oliva       | 4                        | AF483876 | 3                   | 10                            |
|                   |                          | X60000   | 2                   |                               |
|                   |                          | AF483902 | 2                   |                               |
|                   |                          | SHP1B    | 2                   |                               |
|                   |                          | AF483884 | 2                   |                               |
|                   |                          | X61293   | 2                   |                               |
| Can.rosso Pium    | 4                        | X80051   | 2                   | 13                            |
|                   |                          | AF483876 | 3                   |                               |
|                   |                          | AF483902 | 2                   |                               |
|                   |                          | AF483884 | 2                   |                               |
|                   |                          | X61293   | 3                   |                               |
| Bottone striato   | 1                        | AF483902 | 2                   | 2                             |
| Purgatorio        | 5                        | X04001   | 2                   | 6                             |
|                   |                          | X80051   | 2                   |                               |
|                   |                          | X61293   | 3                   |                               |
| Verdolino         | 4                        | X04001   | 2                   | 10                            |
|                   |                          | X80051   | 2                   |                               |
|                   |                          | AF483876 | 3                   |                               |
|                   |                          | AF483902 | 3                   |                               |
|                   |                          | X61293   | 4                   |                               |
|                   |                          | AF483867 | 2                   |                               |
| Giallo2_VT        | 1                        | AF483902 | 2                   | 3                             |
| Ciavat picc       | 2                        | AF483876 | 2                   | 6                             |
|                   |                          | X61293   | 2                   |                               |
| S.Lorenzo         | 1                        | X80051   | 2                   | 4                             |
|                   |                          | AF483902 | 2                   |                               |
|                   |                          | AF483884 | 2                   |                               |
| Cera              | 2                        | X61293   | 2                   | 2                             |
| Carne             | 1                        | X80051   | 2                   | 4                             |
|                   |                          | X61293   | 2                   |                               |
